# Supplementary material for: A Quantitative Digital Analysis of Tissue Immune Components Reveals an Immunosuppressive and Anergic Immune Response with Relevant Prognostic Significance in Glioblastoma
Source: MDPI journal article supplement (doi:10.3390/biomedicines10071753), 2022-07-21
Supplement: s1 [file s1]

## Supplementary table

TABLE S1: Comparative table of Tumor Infiltrating Lymphocytes (TILs) in the vaccinated group versus the control group in the primary tumor and in post-treatment recurrence.

| Groups  | Samples       | TILs        |             |             |
|---------|---------------|-------------|-------------|-------------|
|         |               | CD3*        | CD4*        | CD8*        |
| Vaccine | Primary Tumor | 1.13 (0.74) | 0.73 (0.59) | 0.86 (0.51) |
|         | Recurrence    | 1.4 (0.91)  | 0.86 (0.64) | 1.26 (0.7)  |
|         |               | p=0.217     | p=0.499     | p=0.054     |
| Control | Primary Tumor | 1.93 (0.79) | 1.33 (0.81) | 1.73 (0.79) |
|         | Recurrence    | 2.06 (0.59) | 1.2 (0.56)  | 2.06 (0.59) |
|         |               | p=0.546     | p=0.433     | p=0.173     |

(\*) Mean and standard deviation values.
